# Supplementary figures and images for: Near-field diffraction in a two-dimensional V-groove and its role in SERS
Source: Royal Society of Chemistry journal article supplement (doi:10.1039/c1cp21750j), 2011-01-01

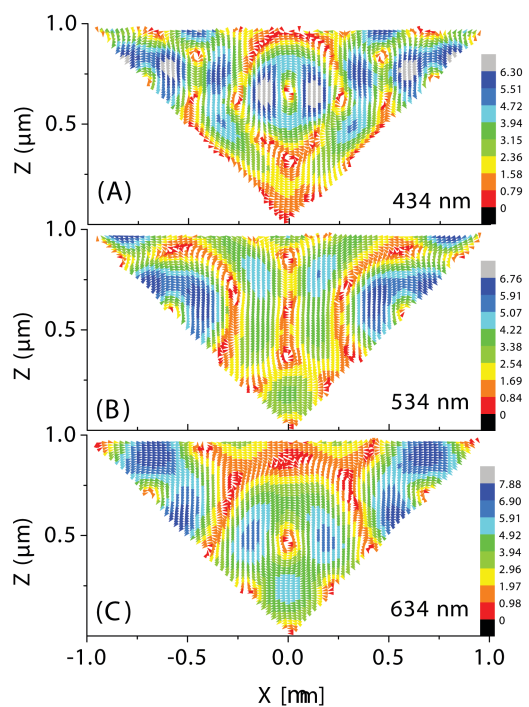

Supplement: c1cp21750j.pdf [file c1cp21750j.pdf]
